# Supplementary figures and images for: InfEHR: Resolving Clinical Uncertainty through Deep Geometric Learning on Electronic Health Records
Source: Research Square preprint supplement (doi:10.21203/rs.3.rs-5953885/v1), 2025-02-17

**Supplemental Figures**


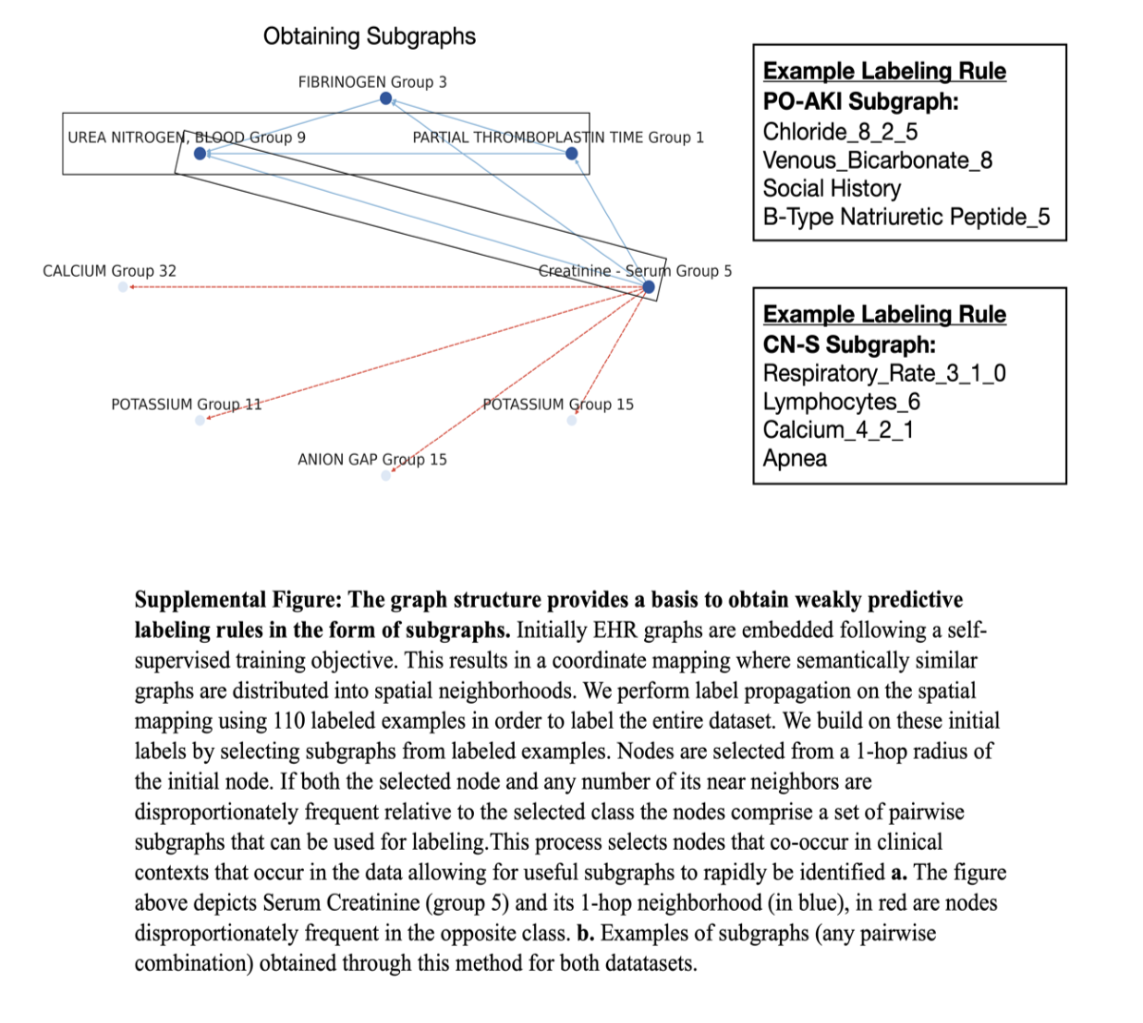


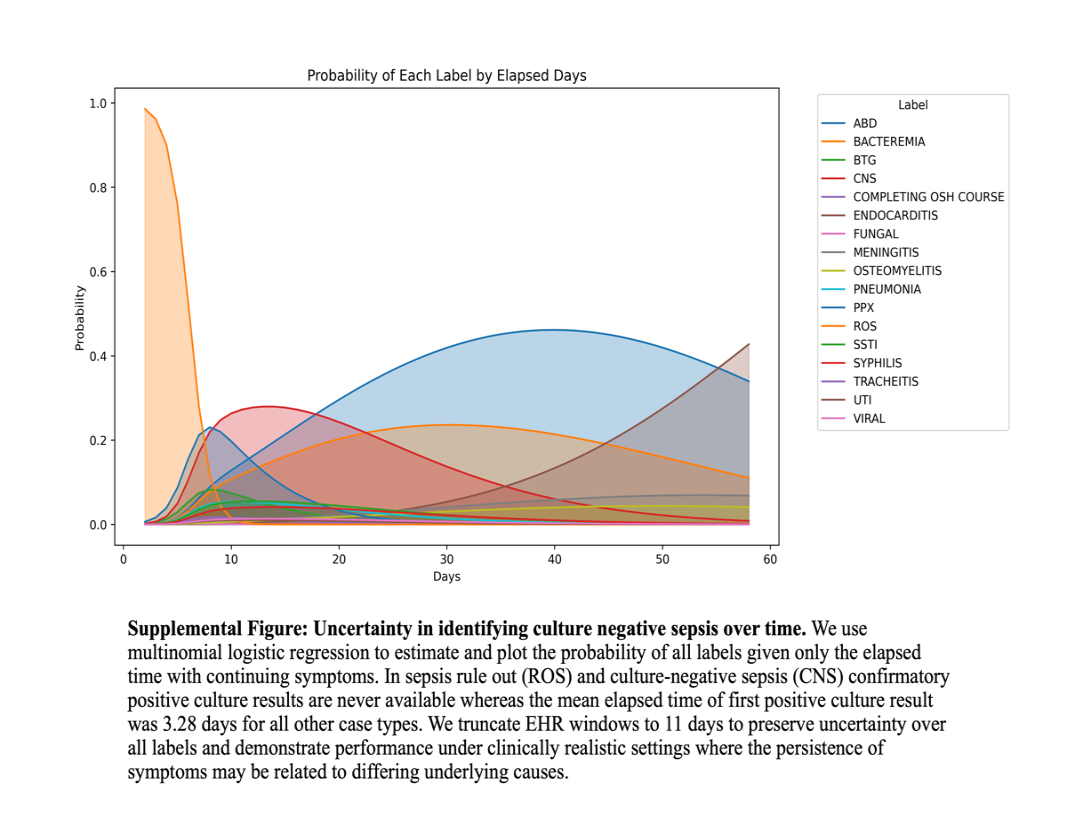

Supplement: Supplementary file 1 [file 349d4beae7d742da5ab4a8a9.docx]
